# Supplementary material
Source: Springer Nature journal article supplement (https://www.springermedizin.de/resource/supplementary/12916_2006_111_MOESM3_ESM.pdf/9599192)

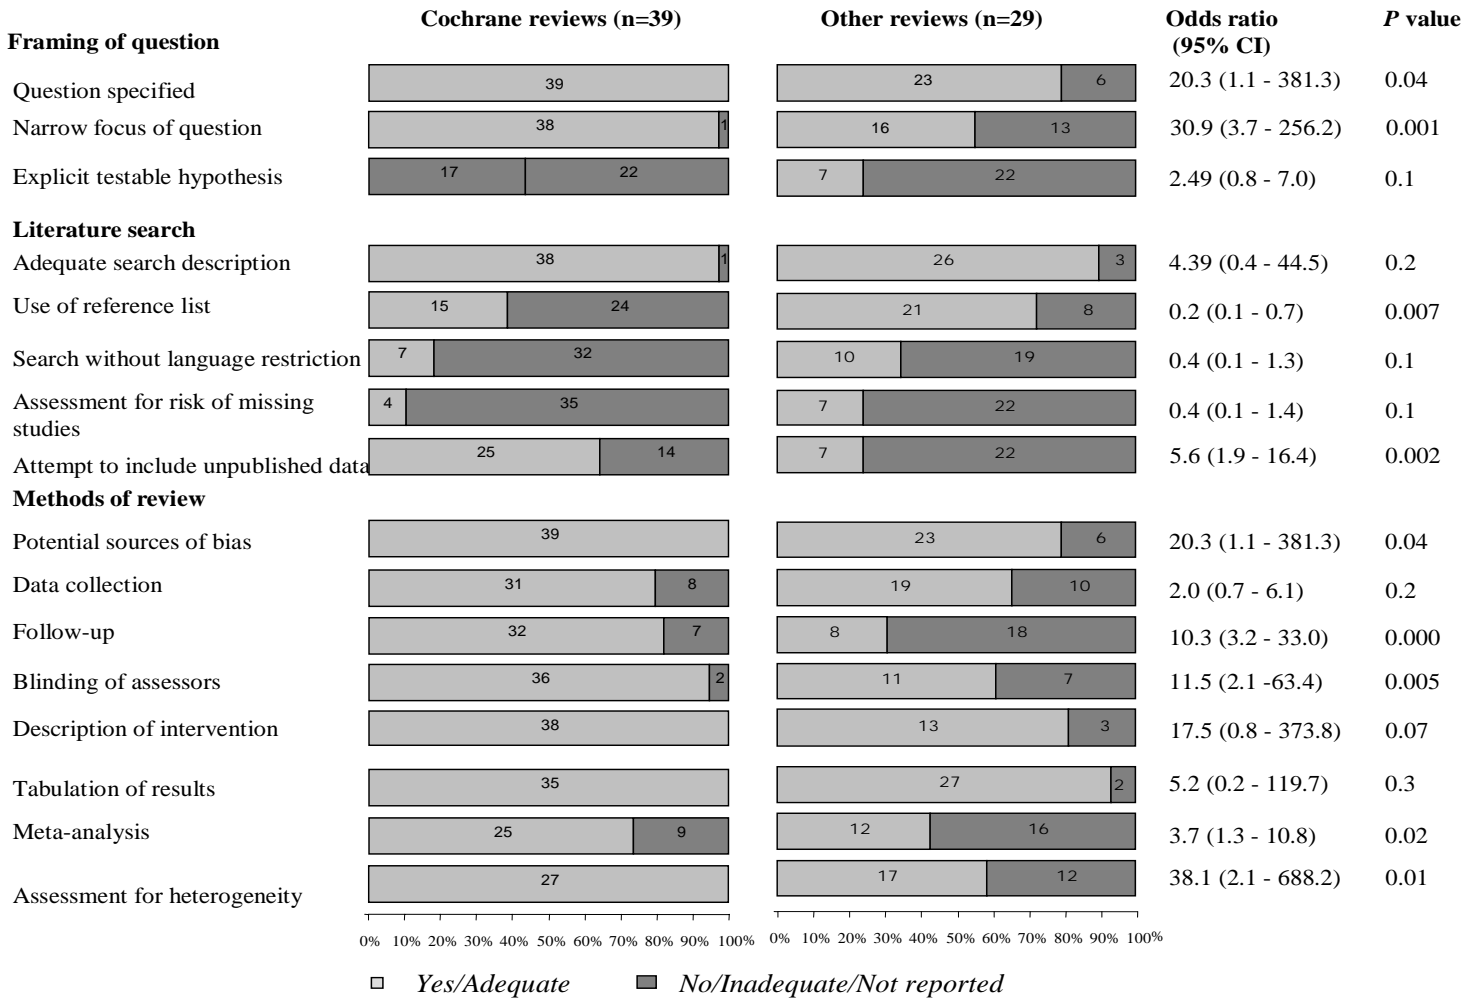

□ *Yes/Adequate*    ■ *No/Inadequate/Not reported*

Supplement: MOESM3 [file 9599192]
